# Supplementary material
Source: PubMed Central journal article supplement (PMC8379795)
Supplement: 12977_2021_568_MOESM1_ESM.pdf [file 12977_2021_568_MOESM1_ESM.pdf]

1E5 VH

FR1

CDR1

MDWTWRILLLVAAATGVHSQVQLVESGAEVKKPGSSVKVSCAS **GGSF**TSYA INWVR

FR2

CDR2

FR3

QAPGQGLEWMGR **IIPILDVP** NYAQKFQGRLTIIADKSTTAAYMELSSLRSEDVAVYY

CDR3

C **ARLGGSSIAFDL**

1E5 VK

FR1

CDR1

MVLQQTQVFISLLLWISGAYGDIVMTQSPGTLISLSRGERATLSCRAS **QSVGSNFL** AWY

FR2

CDR2

FR3

QQKPGQAPRLIS **AAS** SRATGIPDRFSGSGSGTEFSLTISRLEPEDFAMYYC **QQYG**

CDR3

**SSLFT**
