# Supplementary material
Source: PubMed Central journal article supplement (PMC8379795)
Supplement: 12977_2021_568_MOESM3_ESM.pdf [file 12977_2021_568_MOESM3_ESM.pdf]

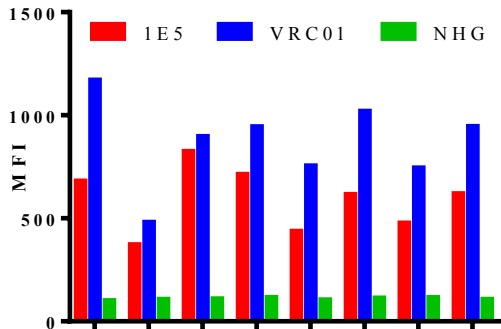

93TH966.8\_MUTANTS

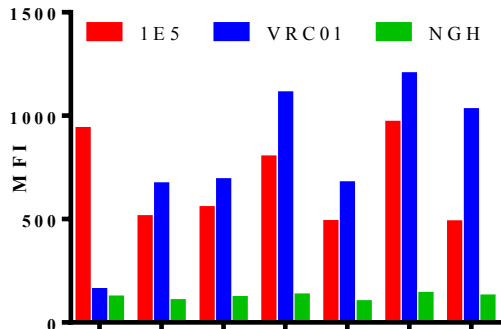

93TH976.17\_MUTANTS
