# Supplementary material
Source: PubMed Central journal article supplement (PMC8379795)

**93TH976.17**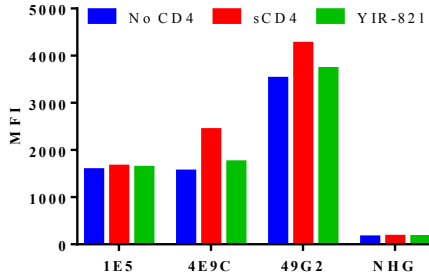**CRF02\_AG-257**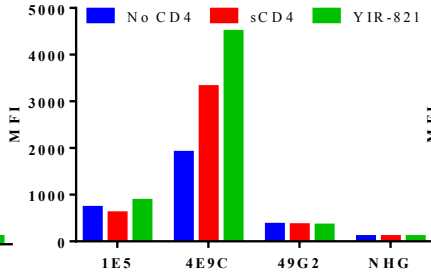**JR-FL**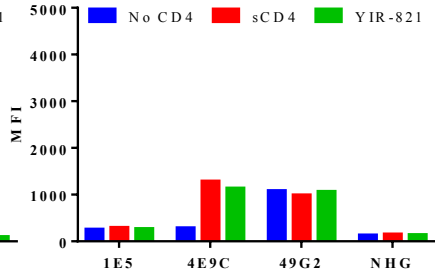

Supplement: 12977_2021_568_MOESM4_ESM.pdf [file 12977_2021_568_MOESM4_ESM.pdf]
