# Supplementary material
Source: PubMed Central journal article supplement (PMC8379795)

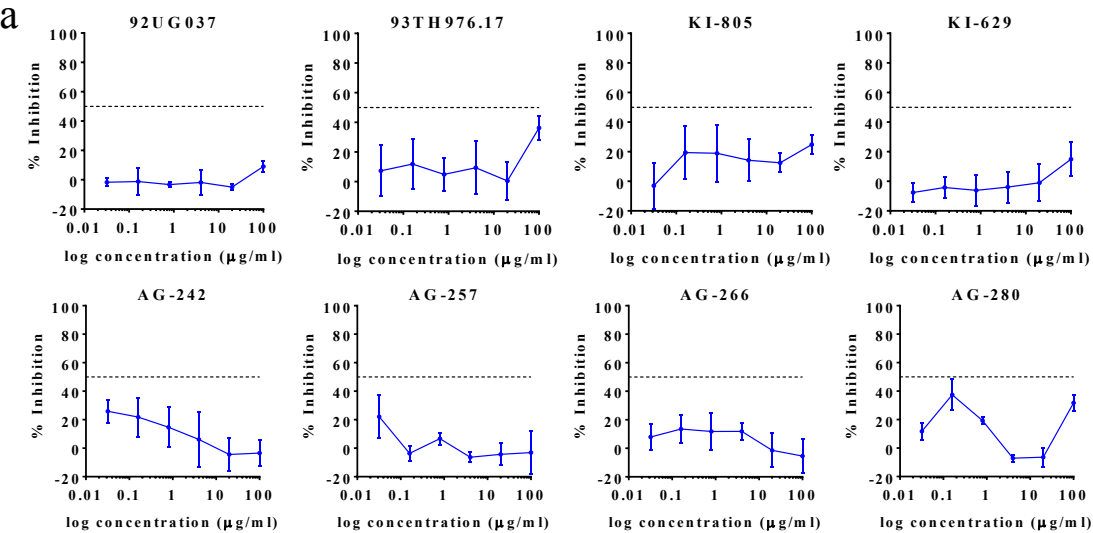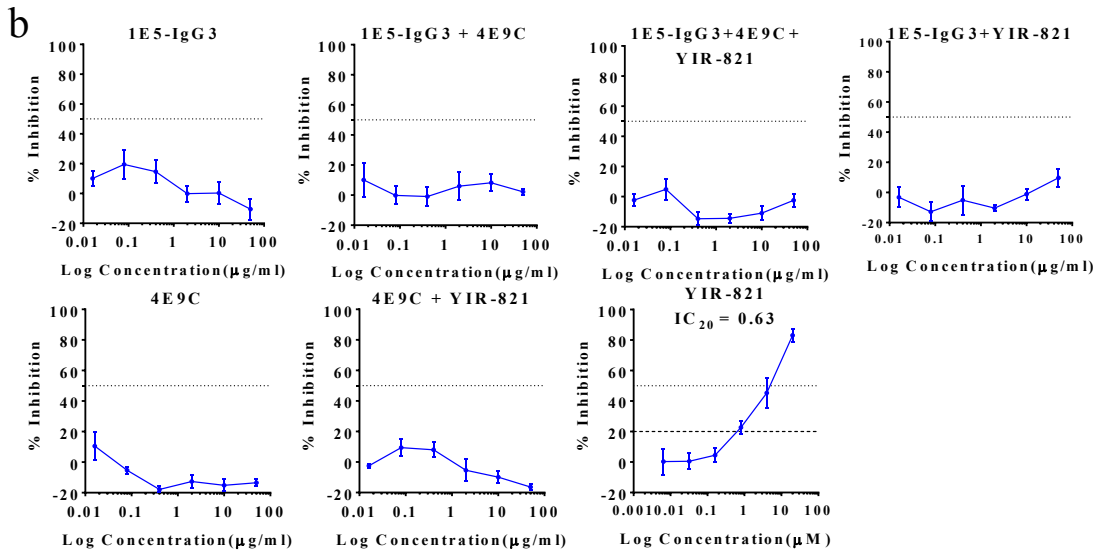

Supplement: 12977_2021_568_MOESM6_ESM.pdf [file 12977_2021_568_MOESM6_ESM.pdf]
