# Supplementary material
Source: PubMed Central journal article supplement (PMC8379795)

— NHG      — Test IgG      — Test IgG + YIR-821  
— Test IgG + YIR-821 + 17b      — Test IgG + YIR-821 + 4E9C

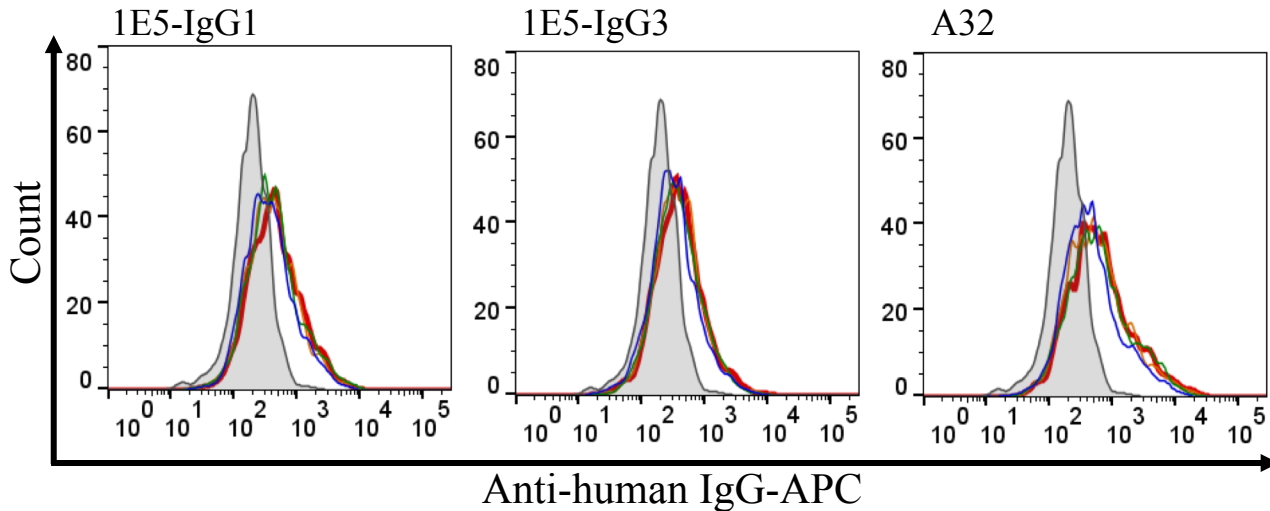

Supplement: 12977_2021_568_MOESM7_ESM.pdf [file 12977_2021_568_MOESM7_ESM.pdf]
