# Supplementary material
Source: PubMed Central journal article supplement (PMC8379795)
Supplement: 12977_2021_568_MOESM10_ESM.pdf [file 12977_2021_568_MOESM10_ESM.pdf]

Table S1. Second-round PCR primers

| Primers                | 5'-3' Sequence                                    |
|------------------------|---------------------------------------------------|
| <b>Forward Primers</b> |                                                   |
| <b>VH</b>              |                                                   |
| 5' SgrAI VH1           | TGGTGGCAGCAGCCAccGGTGTACATTCCCAGGTGCAGCTGGTGCAG   |
| 5' SgrAI VH1-5         | TGGTGGCAGCAGCCAccGGTGTACATTCCGAGGTGCAGCTGGTGCAG   |
| 5' SgrAI VH3           | TGGTGGCAGCAGCCAccGGTGTACATTCTGAGGTGCAGCTGGTGGAG   |
| 5' SgrAI VH3-23        | TGGTGGCAGCAGCCAccGGTGTACATTCTGAGGTGCAGCTGTTGGAG   |
| 5' SgrAI VH4           | TGGTGGCAGCAGCCAccGGTGTACATTCCCAGGTGCAGCTGCAGGAG   |
| 5' SgrAI VH4-34        | TGGTGGCAGCAGCCAccGGTGTACATTCCCAGGTGCAGCTACAGCAGTG |
| 5' SgrAI VH1-18        | TGGTGGCAGCAGCCAccGGTGTACATTCCCAGGTTCAGCTGGTGCAG   |
| 5' SgrAI VH1-24        | TGGTGGCAGCAGCCAccGGTGTACATTCCCAGGTCCAGCTGGTACAG   |
| 5' SgrAI VH3-33        | TGGTGGCAGCAGCCAccGGTGTACATTCTCAGGTGCAGCTGGTGGAG   |
| 5' SgrAI VH3-9         | TGGTGGCAGCAGCCAccGGTGTACATTCTGAAGTGCAGCTGGTGGAG   |
| 5' SgrAI VH4-39        | TGGTGGCAGCAGCCAccGGTGTACATTCCCAGCTGCAGCTGCAGGAG   |
| 5' SgrAI VH6-1         | TGGTGGCAGCAGCCAccGGTGTACATTCCCAGGTACAGCTGCAGCAG   |
| <b>VK</b>              |                                                   |
| 5' EcoRV Vk 1-5        | GGTGCCTACGGGGATATCCAGATGACCCAGTC                  |
| 5' EcoRV Vk 1-9        | GGTGCCTACGGGGATATCCAGTTGACCCAGTCT                 |
| 5' EcoRV Vk 1D-43      | GGTGCCTACGGGGATATCCGGATGACCCAGTC                  |
| 5' EcoRV Vk 2-24       | GGTGCCTACGGGGATATTGTGATGACCCAGAC                  |
| 5' EcoRV Vk 2-28       | GGTGCCTACGGGGATATTGTGATGACTCAGTC                  |
| 5' EcoRV Vk 2-30       | GGTGCCTACGGGGATGTTGTGATGACTCAGTC                  |
| 5' EcoRV Vk 3-11       | GGTGCCTACGGGGATATTGTGTTGACACAGTC                  |
| 5' EcoRV Vk 3-15       | GGTGCCTACGGGGATATAGTGATGACGCAGTC                  |
| 5' EcoRV Vk 3-20       | GGTGCCTACGGGGATATTGTGTTGACGCAGTCT                 |
| 5' EcoRV Vk 4-1        | GGTGCCTACGGGGATATCGTGATGACCCAGTC                  |
| <b>VL</b>              |                                                   |
| 5' SfoI VI1            | ACTTTCTGCACAGGCTCCTGGGCCAGTCTGTGCTGACKCAG         |
| 5' SfoI VI2            | ACTTTCTGCACAGGCTCCTGGGCCAGTCTGCCCTGACTCAG         |
| 5' SfoI VI3            | ACTTTCTGCACAGGCTCTGTGACCTCCTATGAGCTGACWCAG        |
| 5' SfoI VI4/5          | ACTTTCTGCACAGGCTCTCTCTCSCAGCYTGTGCTGACTCA         |
| 5' SfoI VI6            | ACTTTCTGCACAGGCTCTTGGGCCAATTTTATGCTGACTCAG        |
| 5' SfoI VI7/8          | ACTTTCTGCACAGGCTCCAATTCYCAGRCTGTGGTGACYCAG        |
| <b>Reverse primers</b> |                                                   |
| <b>VH</b>              |                                                   |
| APS-R                  | GGGGGAAGACCGATgggc                                |
| <b>VK</b>              |                                                   |
| HCK5-B                 | GAAGACAGATGGTGCAGCCACAGT                          |
| <b>VL</b>              |                                                   |
| VL-R                   | CAGTGTGGCCTTGTTGGCTTG                             |
